# Supplementary material for: Human B1 Cells are the Main Blood Group A-Specific B Cells That Have a Moderate Correlation With Anti-A Antibody Titer
Source: PubMed Central journal article supplement — Ann Lab Med. 2019 Aug 19;40(1):48–56. doi: 10.3343/alm.2020.40.1.48 (PMC6713656; doi:10.3343/alm.2020.40.1.48), 2019-08-19
Supplement: alm-40-48-s001.pdf [file alm-40-48-s001.pdf]

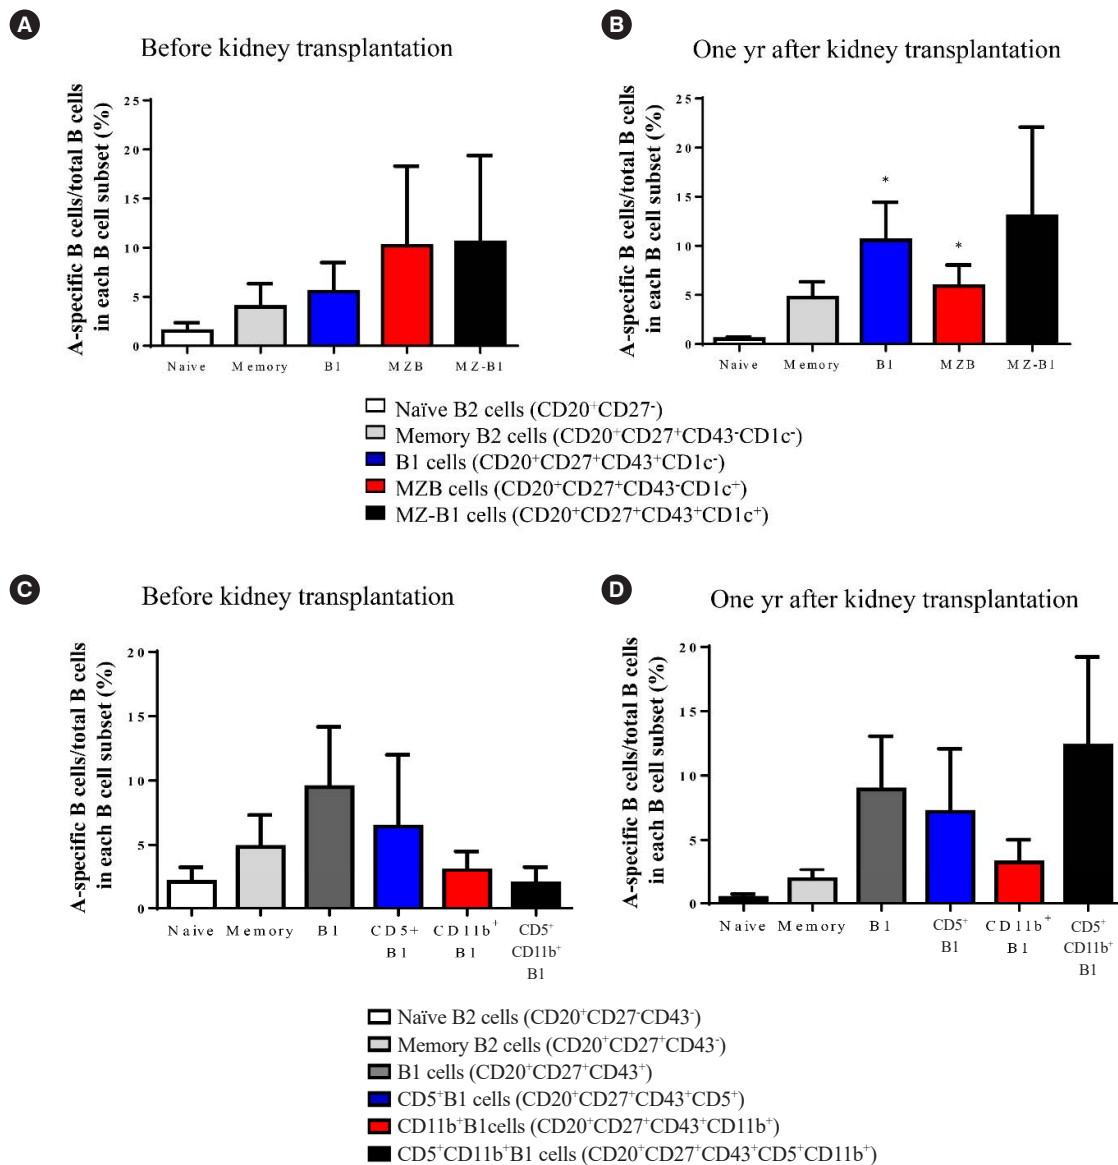

**Supplemental Data Fig. S1.** Proportions of blood group A-specific B cell subsets. (A, B) The proportion of blood group A-specific B cells among each B cell subset before (A) and one year after (B) kidney transplantation. B cell subsets were classified into memory B2 cells (CD20<sup>+</sup>CD27<sup>+</sup>CD43<sup>-</sup>CD1c<sup>-</sup>), MZB cells (CD20<sup>+</sup>CD27<sup>+</sup>CD43<sup>-</sup>CD1c<sup>-</sup>), B1 cells (CD20<sup>+</sup>CD27<sup>+</sup>CD43<sup>+</sup>CD1c<sup>-</sup>), and MZ-B1 cells (CD20<sup>+</sup>CD27<sup>+</sup>CD43<sup>+</sup>CD1c<sup>+</sup>). (C, D) The proportion of blood group A-specific B cells among each B cell subset before (C) and one year after (D) kidney transplantation. B cell subsets were classified into CD27<sup>-</sup>CD43<sup>-</sup> naïve B2 cells, CD27<sup>+</sup>CD43<sup>-</sup> memory B2 cells, CD27<sup>+</sup>CD43<sup>+</sup> B1 cells, CD5<sup>+</sup> B1 cells, CD11b<sup>+</sup> B1 cells, and CD5<sup>+</sup>CD11b<sup>+</sup> B cells. The results are expressed as the mean ± SEM; N=8 in the pre-transplant groups and N=10 in the post-transplant groups.

\**P* < 0.05 compared with the naïve B2 cell group.

Abbreviations: MZB, marginal zone B cells; MZ-B1, marginal zone-B1 cells; SEM, standard error of the mean.
